# Supplementary material for: Modelling focused electron beam induced deposition beyond Langmuir adsorption
Source: Beilstein J Nanotechnol. 2017 Oct 13;8:2151–61. doi: 10.3762/bjnano.8.214 (PMC5647696; doi:10.3762/bjnano.8.214)
Supplement: File 2 — FEBID frequency tool. A spreadsheet for the quick calculation of characteristic frequencies. [file Beilstein_J_Nanotechnol-08-2151-s002.xlsx]

## Sheet: Sheet1
			Frequency Ratios					REFERENCE TABLES
			ν2/νe	25650.5	νe/ν2	3.89857e-05
			νGAS/νe	16.9665	νe/νGAS	0.0589395		ν2		Temperature [K]
			νGAS/ν2	0.000661452	ν2/νGAS	1511.83				70	300	500
								Enthalpy [kJ/mole]	80	1.88956e-47	0.116007	43520.2
	Experimental Conditions								50	4.7068e-25	19512	5.94541e+07
	Chamber Pressure [mbar]	7e-06	=	0.0007	[Pa]				30	4.01454e-10	5.94541e+07	7.31996e+09
	Chamber base pressure [mbar]	1e-08	=	1e-06	[Pa]
	Temperature [K]	300
	Precursor properties							νGAS		GIS Diameter [μm]
	Des. Attempt freq. [1/s]	10000000000000								300	600	1200
	E1 (Chemisorption) [meV]	1200	=	1.92261e-19	[J]			Growth P [mbar]	1e-07	2025.37	506.343	126.586
	Condens. Enthalpy [kJ/mole]	30	=	4.98162e-20	[J]				1e-05	224816	56204.1	14051
	E2 (From Enthalpy) [meV]	310.928		ν1	6.78277e-08	[1/s]			0.001	2.25039e+07	5.62598e+06	1.4065e+06
	Molecular diameter [m]	7e-10		ν2	5.94541e+07	[1/s]
	N0 [1/m2]	2.04082e+18
	Flux - From turbo-pump specifications							νe		Eff. Spot Diameter [nm]
	Turbo Pump Speed	168	[litres/s]							5	30	300
	Turbo Pump Extraction	2.83652e+16	[molecules/s]					Current [A]	1e-12	3973.47	110.374	1.10374
	GIS diameter	0.0006	[m]						1e-09	3.97347e+06	110374	1103.74
	Sticking Factor	1		νGAS	39326	[1/s]			1e-06	3.97347e+09	1.10374e+08	1.10374e+06
	Flux from GIS	1.00321e+23	[molecules/(s·m^2)]
	Geometrical correction	0.8
	Flux at substrate surface	8.02571e+22	[molecules/(s·m^2)]
	Electron Dissociation
	Effective Beam Diam. [m]	3e-08
	Effective Beam Area [m^2]	7.06858e-16		νe	2317.86	[1/s]
	Beam Current [pA]	21	=	2.1e-11	[A]
	SE Yield	2.5
	Electron flux	4.63571e+23	[electrons/(m^2*s)]
	Dissociation Cross Section	5e-21	[m^2]
	Constants
	Electron charge [C]	1.60218e-19
	Na (Avogadro)	6.02214e+23
	KB [m^2*kg/(s^2*K)]	1.38e-23
	Unif. Atomic Mass Unit [kg]	1.66504e-27
